# Supplementary material
Source: PubMed Central journal article supplement (PMC4878138)
Supplement: NIHMS758294-supplement-3.pdf [file NIHMS758294-supplement-3.pdf]

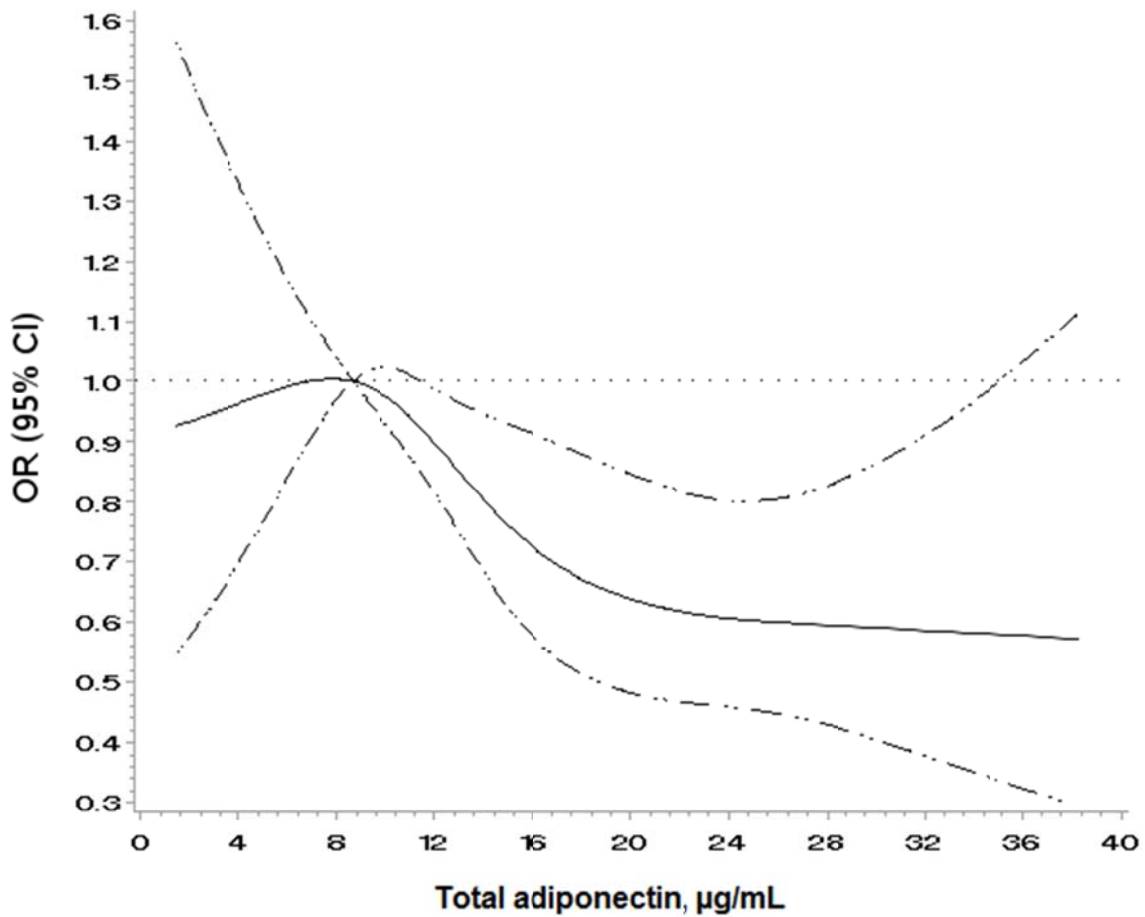

**Figure S1. Risk of MM in relation to circulating total adiponectin levels estimated using a restricted cubic spline regression model with 4 knots.** The odds ratio (OR) is represented by the solid line, and the upper and lower confidence intervals (CI) are represented by the dashed lines. A test for a linear relation was statistically significant ( $P = 0.0007$ ), and there was no evidence of departure from linearity ( $P$  for non-linearity = 0.4).
